# Supplementary material for: A novel strategy for clustering major depression individuals using whole-genome sequencing variant data
Source: PubMed Central journal article supplement (PMC5347377; doi:10.1038/srep44389), 2017-03-13
Supplement: srep44389-s1.pdf [file srep44389-s1.pdf]

# **A novel strategy for clustering major depression individuals using whole-genome sequencing variant data**

## **Supplementary Information**

Chenglong Yu, Bernhard T. Baune, Julio Licinio & Ma-Li Wong

### **Whole-Genome Sequencing (WGS) and Analysis**

Fifteen Mexican-American subjects were whole-genome sequenced using Illumina HiSeq 2000 (BGI-Shenzhen, Shenzhen, Guangdong, China) and ten European-Ancestry Australian subjects were whole-genome sequenced using HiSeq X (Garvan Institute, Sydney, New South Wales, Australia). The read length for Mexican-American subjects is 151 and the read length for Australian subjects is 90. All the sequencing reads passed the quality control by evaluation of FastQC ([www.bioinformatics.babraham.ac.uk/projects/fastqc/](http://www.bioinformatics.babraham.ac.uk/projects/fastqc/)).

Firstly, we aligned the paired-end reads of each subject to the human reference genome (hg19, Genome Reference Consortium GRCh37) using Burrows-Wheeler Aligner (BWA) to obtain SAM format files, which were then converted to BAM format files using SAMtools. For example, align one sample of WGS paired-end reads (e.g., READS\_R1 and READS\_R2) to hg19 using the following commands:

```
bwa index hg19.fa  
  
bwa aln -t 24 hg19.fa READS_R1.fastq.gz -f READS_R1.sai  
  
bwa aln -t 24 hg19.fa READS_R2.fastq.gz -f READS_R2.sai  
  
bwa sampe -a 1000 -n 1 -N 0 READS_R1.sai READS_R2.sai READS_R1.fastq.gz  
READS_R2.fastq.gz | samtools view -Sbh - > READS.bam
```

Secondly, BAM files were then sorted and merged into one BAM file using the

following commands. Note: Mexico-American subjects have 8 lanes of sequencing reads, while Australian subjects have 2 lanes of sequencing reads.

```
samtools sort READS.bam READS.sort
```

```
samtools merge READS.merge.bam READS.lane1.sort.bam READS.lane2.sort.bam ...  
READS.lane8.sort.bam
```

```
samtools index READS.merge.bam
```

Until here, for one subject, no matter how many lanes of reads, it has two files associated with: READS.merge.bam and READS.merge.bam.bai.

Thirdly, mpileup command in SAMtools was applied to calculate the likelihood of data given each possible genotype, and stored the likelihoods in a binary file. The output was supplied to SAMtools/BCFtools which created SNV and INDEL calling to produce VCF files, as follows:

```
samtools mpileup -m 3 -F 0.0002 -E -uf READS.merge.bam | bcftools view -bvcg - >  
READS.merge.raw.bcf
```

(-m: minimum number gapped reads for indel candidates; -F: minimum fraction of gapped reads)

```
bcftools view READS.merge.raw.bcf | vcfutils.pl varFilter -D10000 >  
READS.merge.flt.vcf
```

(-D: the maximum read depth to call a SNP)

Finally, ANNOVAR software was used to annotate SNV/INDEL information and classifications such as their located chromosome, position, genetic region, etc.

The same filtering criteria and quality thresholds used above are performed in this study. All WGS analyses were performed using high performance computers in eResearch South Australia ([www.ersa.edu.au](http://www.ersa.edu.au)).

Table S1: The SNV distributions for all the chromosomes and mitochondrial genome on 25 subjects.

| Subjects         | chr1   | chr2   | chr3   | chr4   | chr5   | chr6   | chr7   |
|------------------|--------|--------|--------|--------|--------|--------|--------|
| AU-Depression-1  | 301103 | 309712 | 257417 | 280613 | 232115 | 224475 | 220584 |
| AU-Depression-2  | 302345 | 308879 | 258428 | 281812 | 230408 | 227551 | 223214 |
| AU-Depression-3  | 300643 | 313677 | 257598 | 277705 | 228690 | 228731 | 217858 |
| AU-Depression-4  | 295673 | 308585 | 257864 | 285079 | 231252 | 225732 | 218744 |
| AU-Depression-5  | 295499 | 309589 | 259592 | 278681 | 231401 | 225789 | 217576 |
| AU-Control-1     | 297701 | 311754 | 252715 | 278477 | 228314 | 223086 | 219690 |
| AU-Control-2     | 298129 | 316209 | 264304 | 280435 | 234834 | 226494 | 226061 |
| AU-Control-3     | 297444 | 310873 | 253499 | 276636 | 230161 | 223149 | 221053 |
| AU-Control-4     | 301728 | 312226 | 258565 | 281661 | 222430 | 231444 | 219742 |
| AU-Control-5     | 299695 | 303323 | 252077 | 279923 | 227056 | 226770 | 214973 |
| MA-Depression-1  | 679766 | 645735 | 524762 | 495349 | 461734 | 448583 | 462339 |
| MA-Depression-2  | 639621 | 616461 | 495345 | 481095 | 437194 | 419596 | 439435 |
| MA-Depression-3  | 658412 | 622542 | 497347 | 482736 | 443255 | 425832 | 446506 |
| MA-Depression-4  | 655935 | 619597 | 499050 | 475129 | 437081 | 439003 | 444769 |
| MA-Depression-5  | 632081 | 608478 | 488763 | 469599 | 431336 | 417863 | 435013 |
| MA-Depression-6  | 634558 | 608724 | 491261 | 470333 | 429661 | 426306 | 437679 |
| MA-Depression-7  | 649148 | 617308 | 500847 | 472364 | 441907 | 429721 | 438998 |
| MA-Depression-8  | 621592 | 585536 | 484652 | 463909 | 420754 | 417845 | 427428 |
| MA-Depression-9  | 635500 | 606553 | 494412 | 473792 | 430628 | 417690 | 435011 |
| MA-Depression-10 | 658107 | 619897 | 508103 | 477713 | 449647 | 453626 | 450334 |
| MA-Control-1     | 630447 | 602339 | 487642 | 487690 | 444983 | 426340 | 441277 |
| MA-Control-2     | 557708 | 543372 | 441458 | 432110 | 392866 | 382895 | 390751 |
| MA-Control-3     | 554411 | 535557 | 429800 | 424226 | 382304 | 376376 | 379690 |
| MA-Control-4     | 574542 | 556280 | 458368 | 442338 | 400717 | 390948 | 403074 |
| MA-Control-5     | 600317 | 582748 | 477077 | 457213 | 419489 | 406146 | 409664 |

Cont'd

| Subjects         | chr8   | chr9   | chr10  | chr11  | chr12  | chr13  | chr14  | chr15  |
|------------------|--------|--------|--------|--------|--------|--------|--------|--------|
| AU-Depression-1  | 199951 | 166209 | 189236 | 194160 | 176898 | 142749 | 124289 | 116527 |
| AU-Depression-2  | 203690 | 168932 | 194438 | 190806 | 177700 | 145497 | 120838 | 115771 |
| AU-Depression-3  | 204146 | 167988 | 194672 | 198832 | 176875 | 142126 | 122030 | 112719 |
| AU-Depression-4  | 200218 | 168508 | 193294 | 195582 | 180722 | 144535 | 122855 | 110824 |
| AU-Depression-5  | 202668 | 167979 | 184994 | 190222 | 176929 | 142061 | 127249 | 113120 |
| AU-Control-1     | 198762 | 163138 | 194487 | 197711 | 175339 | 143577 | 123786 | 112916 |
| AU-Control-2     | 204044 | 170967 | 187319 | 194767 | 180736 | 143947 | 121725 | 112966 |
| AU-Control-3     | 201758 | 168012 | 190355 | 193074 | 176021 | 142611 | 121409 | 111465 |
| AU-Control-4     | 198833 | 167497 | 191316 | 185471 | 176975 | 143964 | 122564 | 116204 |
| AU-Control-5     | 192594 | 164207 | 189857 | 187084 | 175067 | 141986 | 118303 | 110360 |
| MA-Depression-1  | 388959 | 346014 | 403710 | 403719 | 383599 | 256596 | 261939 | 249474 |
| MA-Depression-2  | 378224 | 334776 | 383721 | 382226 | 371303 | 247321 | 243704 | 245237 |
| MA-Depression-3  | 382347 | 345383 | 391092 | 391628 | 370823 | 250641 | 252677 | 238754 |
| MA-Depression-4  | 378379 | 334342 | 382310 | 387161 | 374687 | 252134 | 251719 | 246359 |
| MA-Depression-5  | 372578 | 327002 | 378750 | 379221 | 365658 | 249826 | 248145 | 238535 |
| MA-Depression-6  | 374907 | 331984 | 375119 | 383156 | 365836 | 243267 | 244917 | 235552 |
| MA-Depression-7  | 378682 | 328864 | 380992 | 384237 | 370497 | 252298 | 255155 | 233729 |
| MA-Depression-8  | 372118 | 322243 | 367333 | 371837 | 361448 | 242113 | 242382 | 225683 |
| MA-Depression-9  | 357904 | 322703 | 373350 | 368774 | 364080 | 243454 | 253001 | 233471 |
| MA-Depression-10 | 378306 | 335510 | 391803 | 385678 | 382182 | 259090 | 251310 | 235031 |
| MA-Control-1     | 371106 | 327109 | 375211 | 386518 | 367995 | 246994 | 248941 | 232308 |
| MA-Control-2     | 336789 | 297635 | 332121 | 336995 | 322986 | 229837 | 218757 | 205444 |
| MA-Control-3     | 335511 | 291832 | 333755 | 342052 | 320353 | 221824 | 218206 | 202795 |
| MA-Control-4     | 345336 | 305764 | 346363 | 348015 | 330254 | 234331 | 226578 | 213957 |
| MA-Control-5     | 372216 | 318105 | 354298 | 357862 | 344854 | 247261 | 238118 | 219509 |

Cont'd

| Subjects         | chr16  | chr17  | chr18  | chr19  | chr20  | chr21  | chr22  | chrX   | mitoch. |
|------------------|--------|--------|--------|--------|--------|--------|--------|--------|---------|
| AU-Depression-1  | 123279 | 103626 | 104959 | 86369  | 83018  | 61877  | 53849  | 85949  | 40      |
| AU-Depression-2  | 124506 | 105457 | 111056 | 85690  | 87241  | 61711  | 52871  | 111473 | 33      |
| AU-Depression-3  | 118640 | 103020 | 108004 | 88157  | 85516  | 63612  | 52333  | 113406 | 42      |
| AU-Depression-4  | 124443 | 105421 | 107476 | 88312  | 86334  | 65999  | 53507  | 110517 | 45      |
| AU-Depression-5  | 120287 | 104550 | 109791 | 85490  | 84111  | 63396  | 53973  | 110009 | 37      |
| AU-Control-1     | 122668 | 101500 | 106196 | 89819  | 83122  | 64048  | 52846  | 108968 | 31      |
| AU-Control-2     | 123882 | 106762 | 105875 | 86376  | 84885  | 62649  | 53529  | 88594  | 41      |
| AU-Control-3     | 118510 | 103761 | 106808 | 86074  | 85458  | 61578  | 52225  | 86203  | 36      |
| AU-Control-4     | 122476 | 105047 | 109143 | 83104  | 86669  | 63905  | 55143  | 110453 | 45      |
| AU-Control-5     | 117170 | 101448 | 109008 | 84786  | 83752  | 62618  | 52848  | 83601  | 34      |
| MA-Depression-1  | 296951 | 310799 | 209773 | 285379 | 208912 | 115886 | 157214 | 299345 | 40      |
| MA-Depression-2  | 279068 | 288149 | 200637 | 265679 | 195608 | 113335 | 142242 | 270017 | 45      |
| MA-Depression-3  | 284439 | 289549 | 199756 | 270495 | 198247 | 113783 | 144935 | 283100 | 35      |
| MA-Depression-4  | 278849 | 298315 | 200454 | 268647 | 197554 | 113432 | 145509 | 285835 | 38      |
| MA-Depression-5  | 279323 | 281794 | 200208 | 265182 | 193834 | 110750 | 142277 | 270513 | 35      |
| MA-Depression-6  | 276348 | 283022 | 193048 | 258249 | 190593 | 110934 | 139562 | 274107 | 39      |
| MA-Depression-7  | 274952 | 284617 | 196695 | 266285 | 195801 | 111948 | 143798 | 273209 | 38      |
| MA-Depression-8  | 270432 | 280267 | 196849 | 259618 | 185984 | 114817 | 137540 | 269478 | 32      |
| MA-Depression-9  | 272615 | 278462 | 195224 | 259835 | 194107 | 110746 | 140040 | 262722 | 36      |
| MA-Depression-10 | 276956 | 287267 | 203351 | 262356 | 202473 | 115314 | 146195 | 288671 | 33      |
| MA-Control-1     | 272094 | 284954 | 195064 | 266710 | 195962 | 112194 | 140603 | 282901 | 33      |
| MA-Control-2     | 239736 | 238248 | 176990 | 220995 | 168016 | 102510 | 119637 | 231986 | 33      |
| MA-Control-3     | 244220 | 241203 | 175546 | 223926 | 170704 | 104209 | 121759 | 226966 | 41      |
| MA-Control-4     | 250721 | 250301 | 179152 | 233122 | 174939 | 104086 | 126194 | 245614 | 31      |
| MA-Control-5     | 258634 | 270134 | 188544 | 237801 | 179594 | 107697 | 129601 | 254991 | 47      |

Figure S1: The phylogenetic clustering trees for 25 subjects on chromosomes 2, 3, 4, 5, 6, 7, 8, 9, 10, 11, 12, 13, 14, 15, 16, 17, 18, 19, 20, 21, and mitochondrion. Except the mitochondrial genome, all the other trees can well cluster Mexican-American MDD patients together.

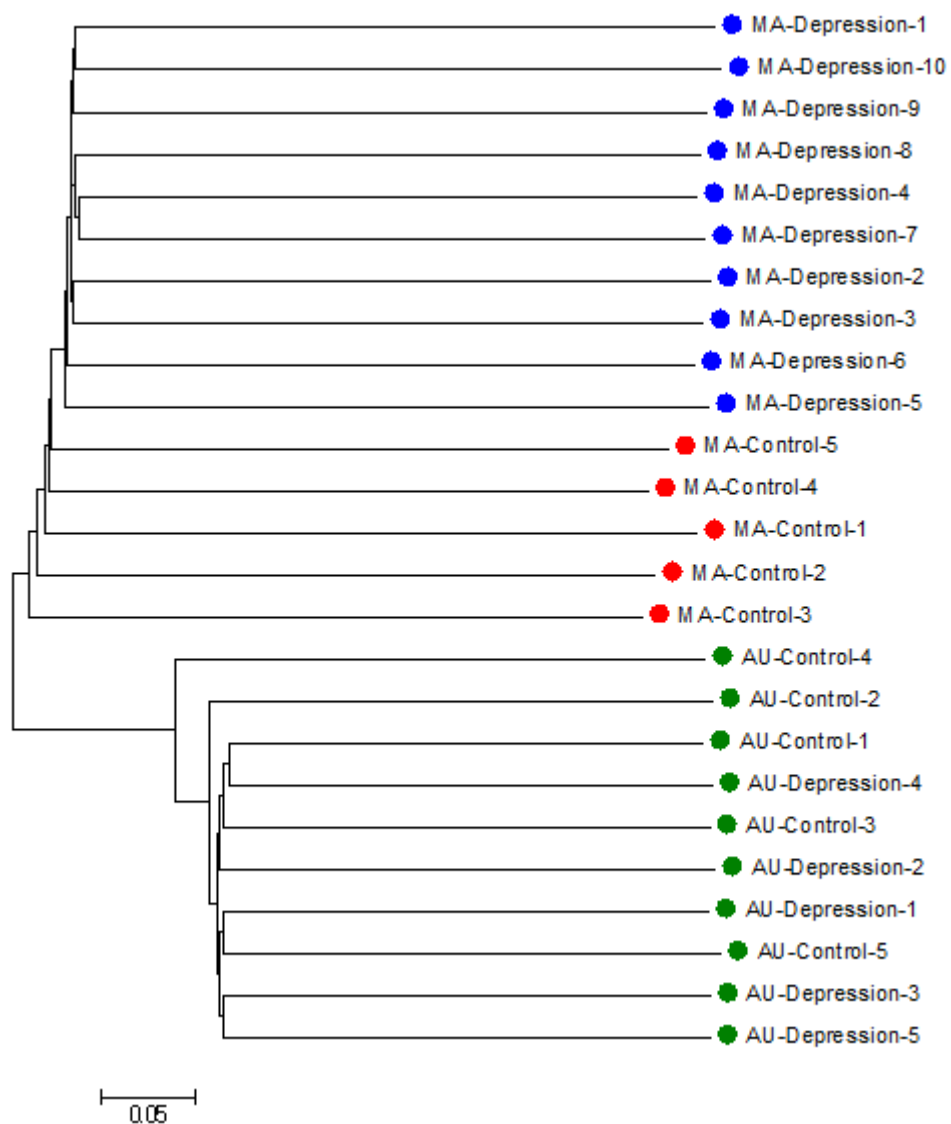

**Chromosome 2**

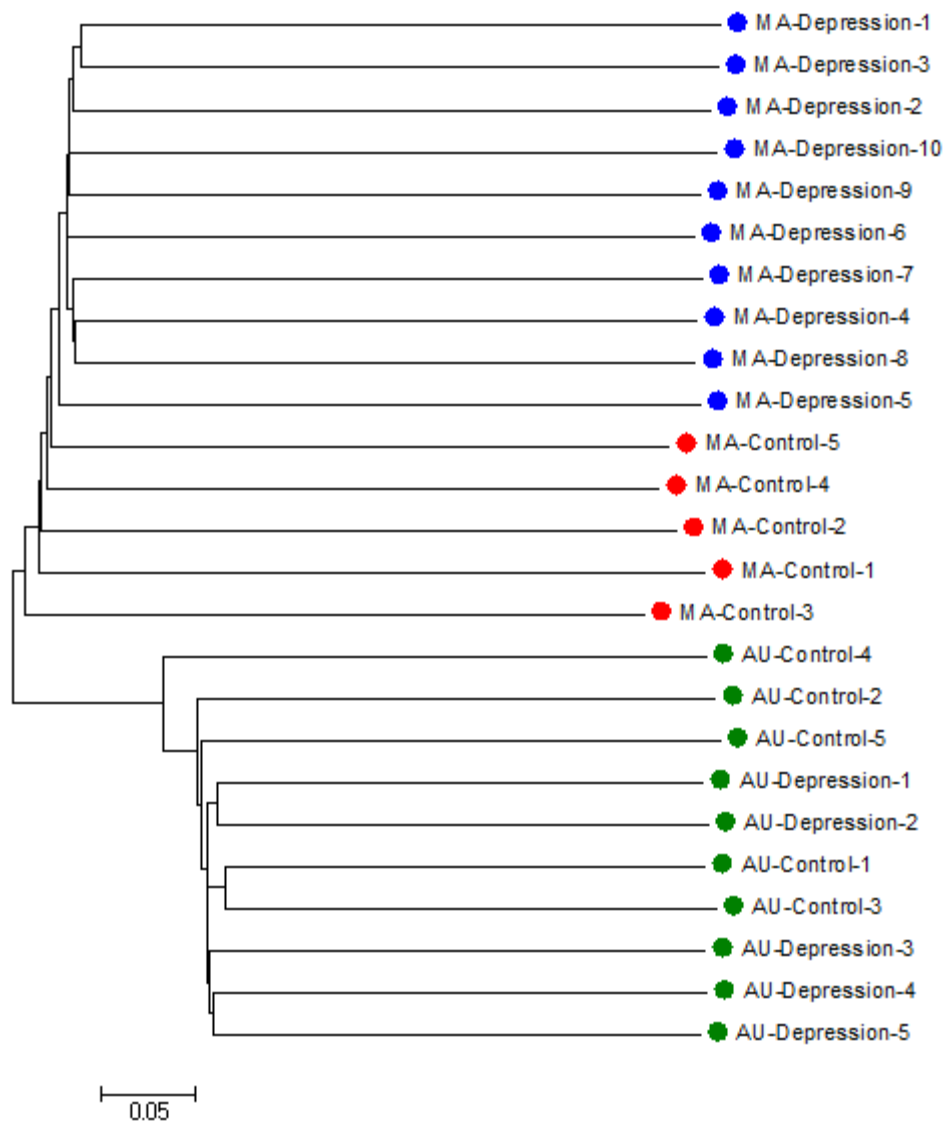

**Chromosome 3**

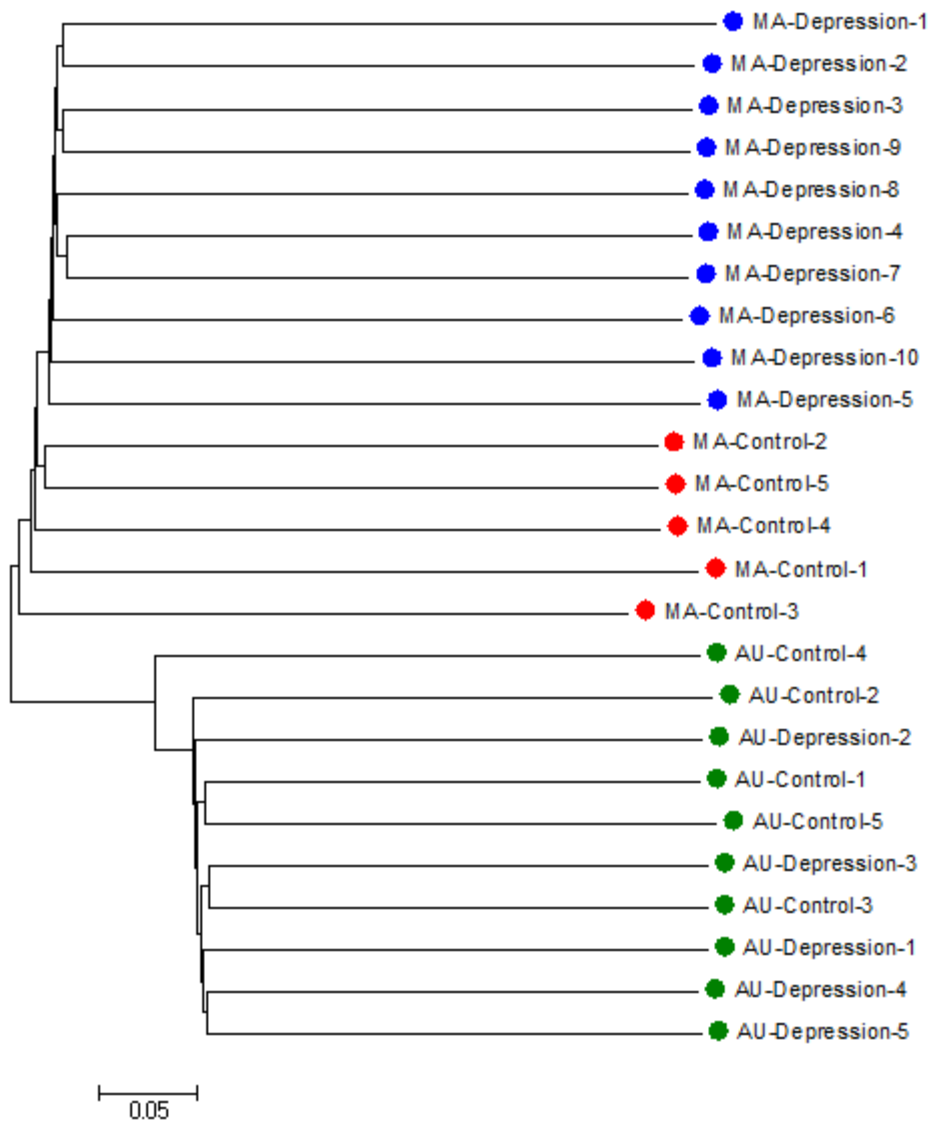

**Chromosome 4**



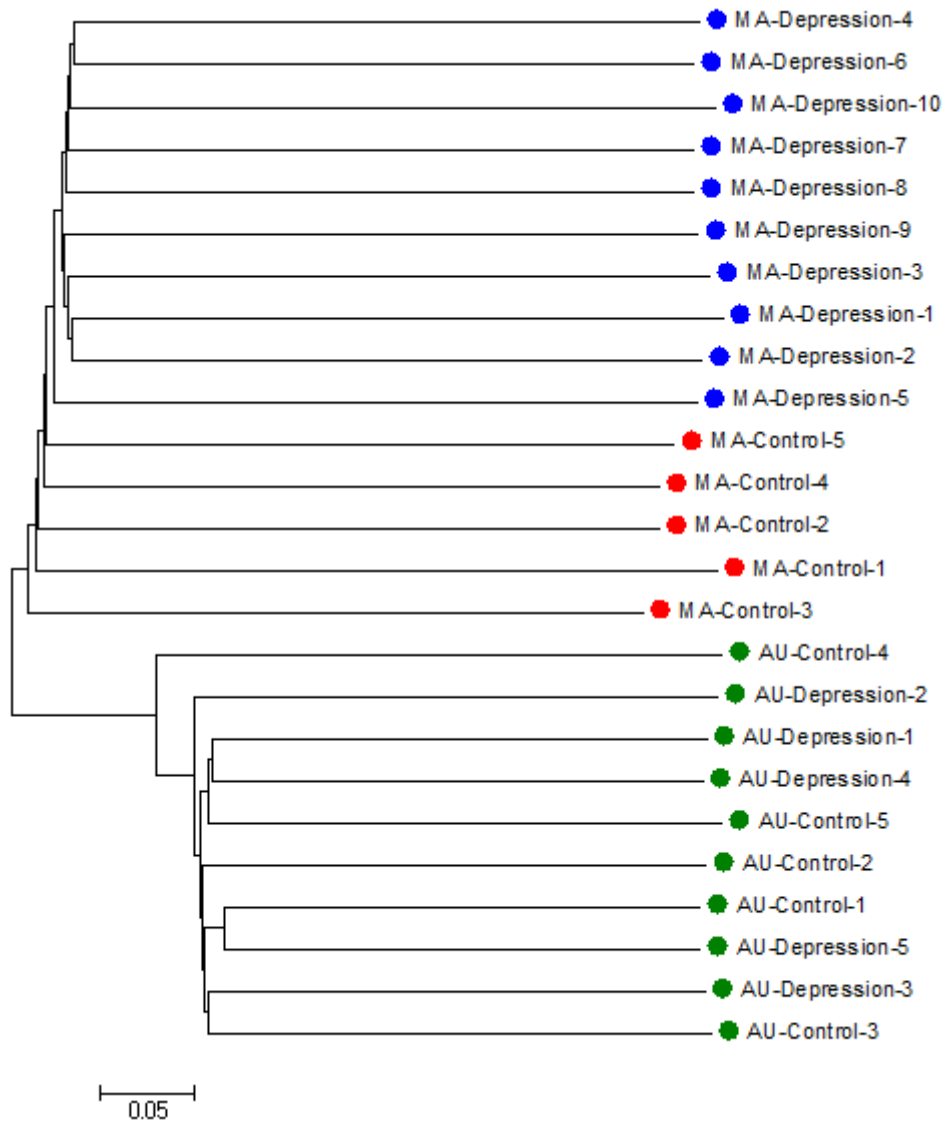

### Chromosome 5

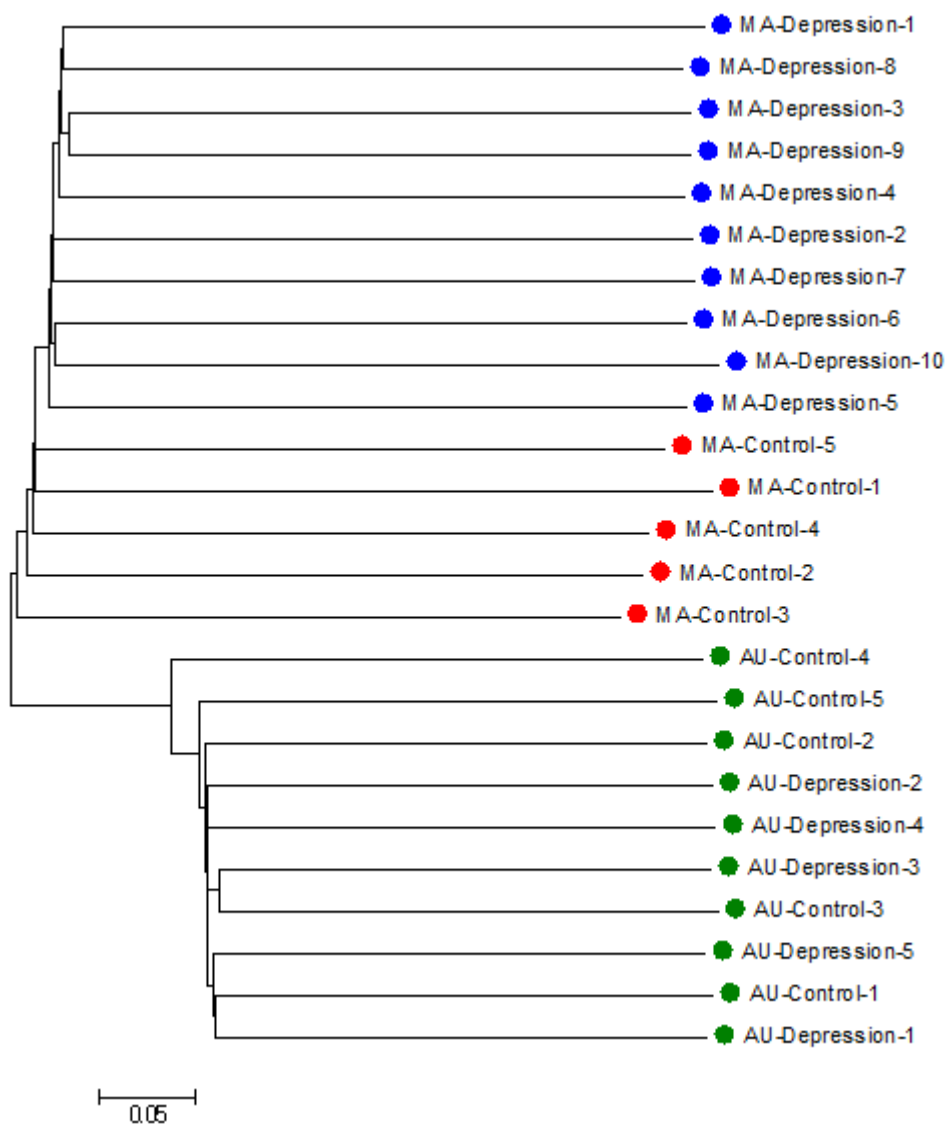

### Chromosome 6

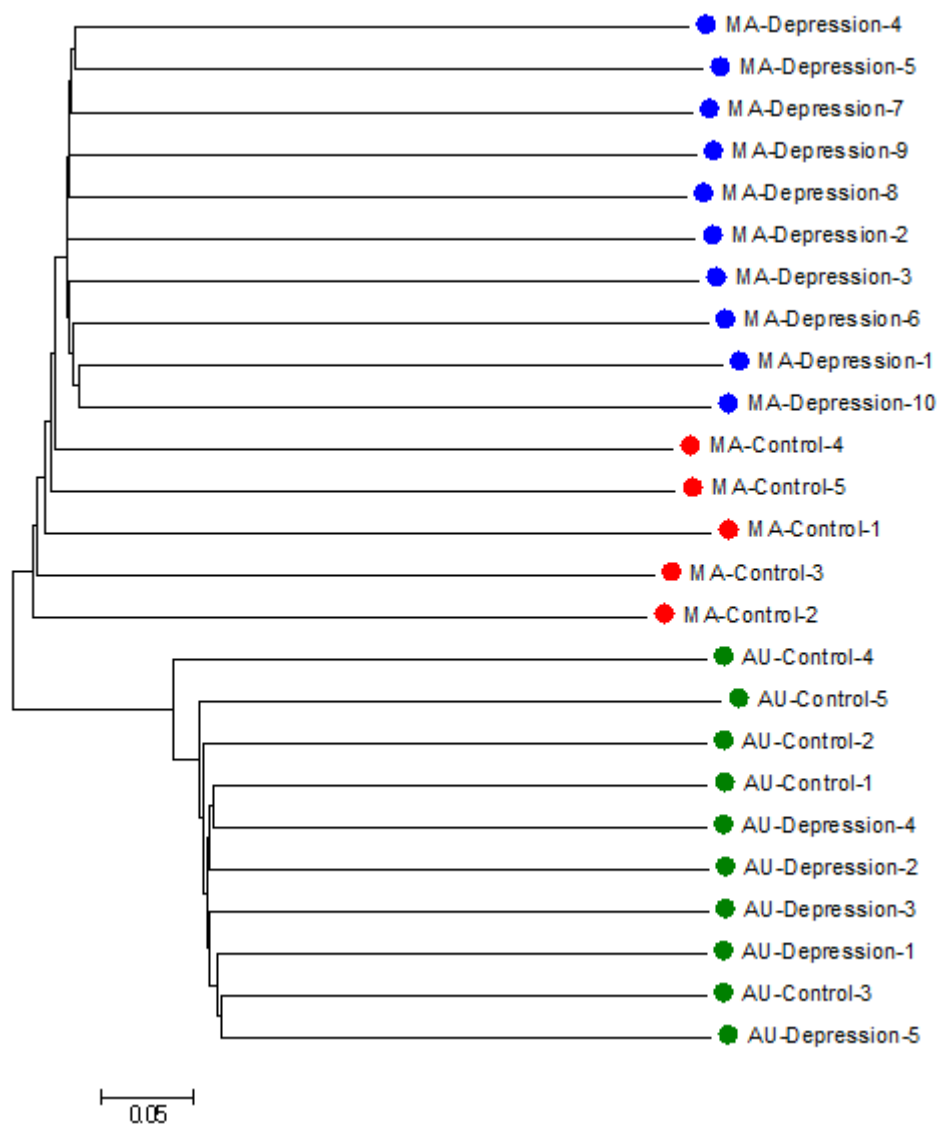

**Chromosome 7**

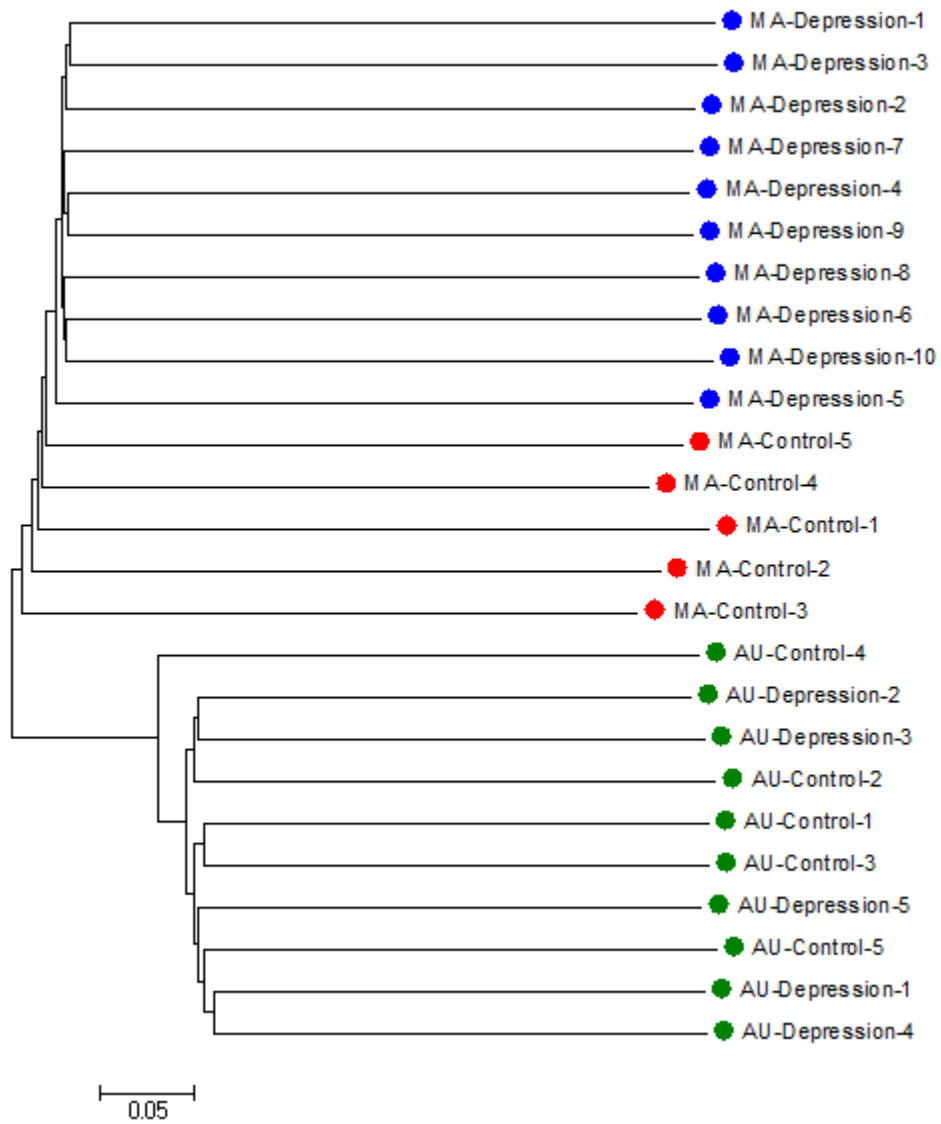

**Chromosome 8**

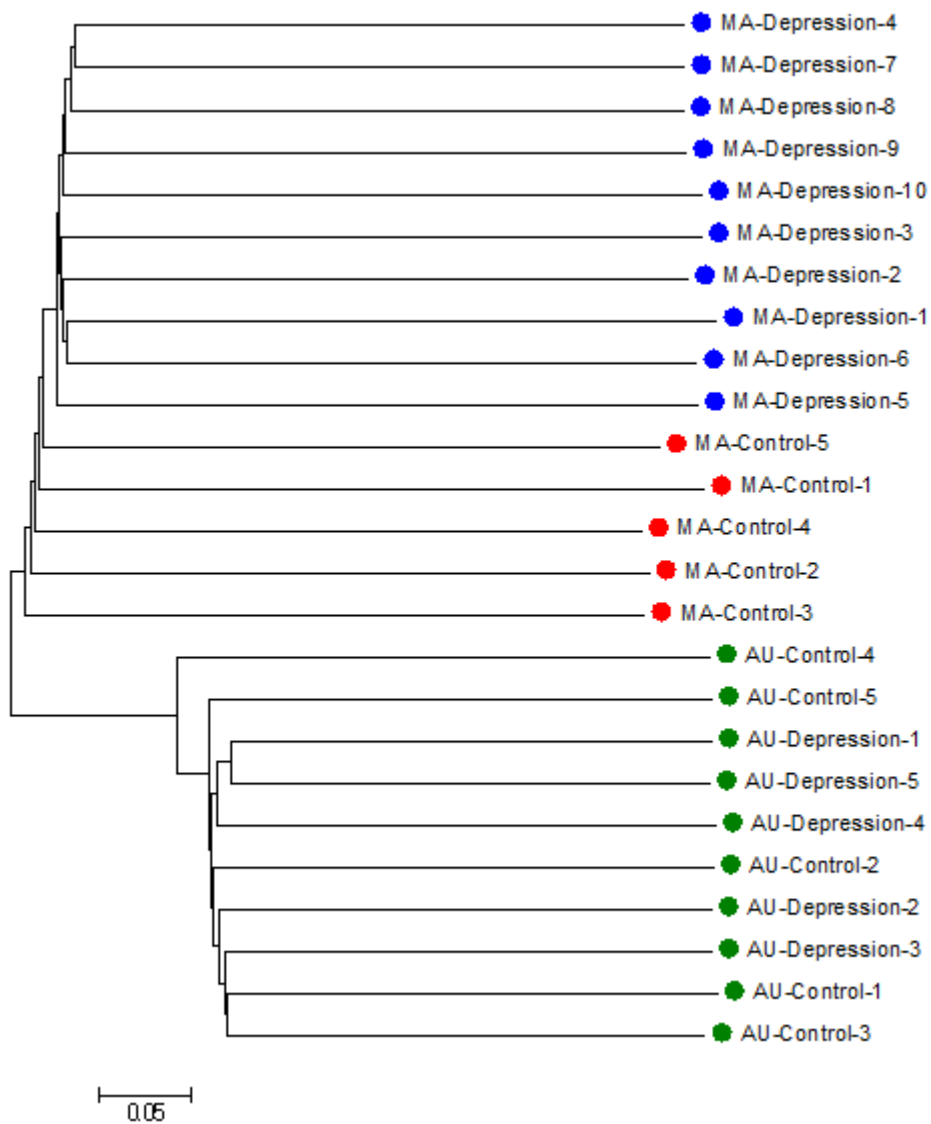

**Chromosome 9**

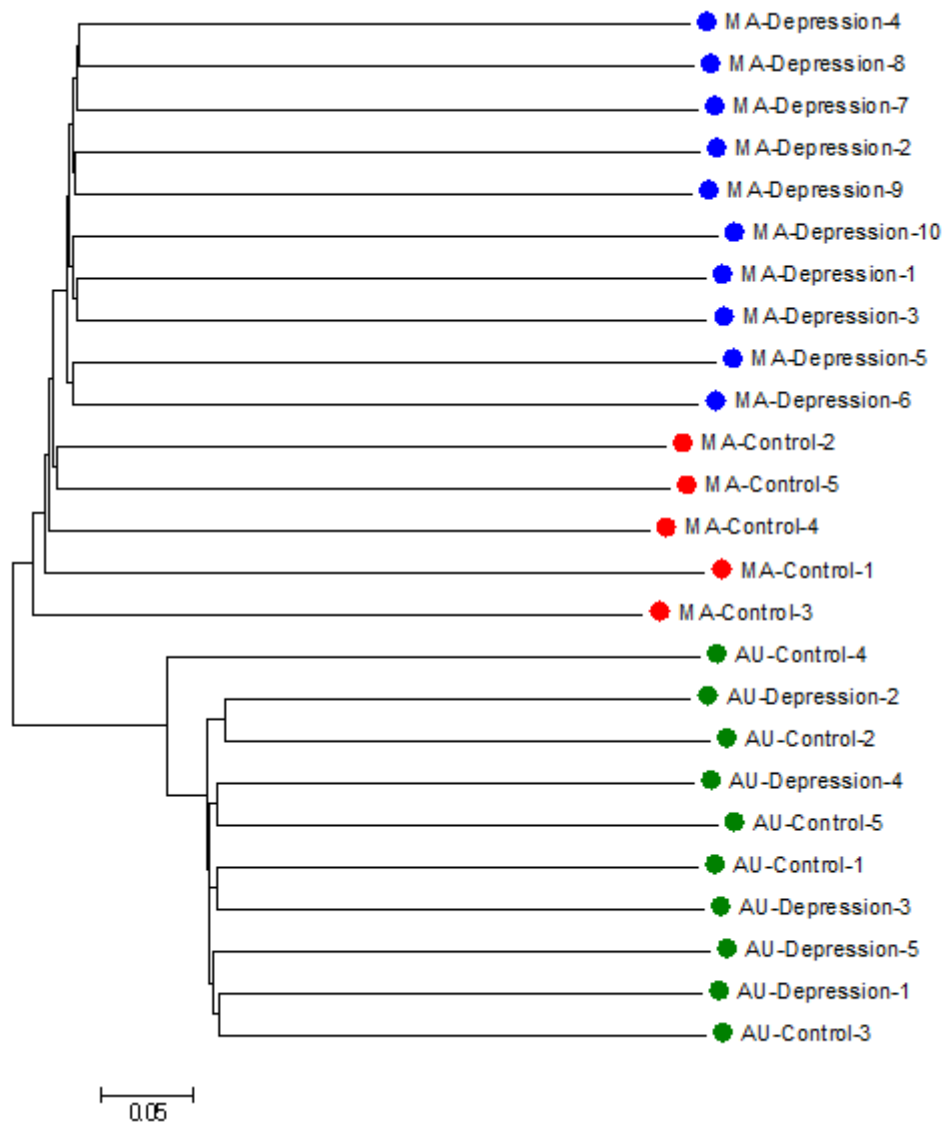

**Chromosome 10**

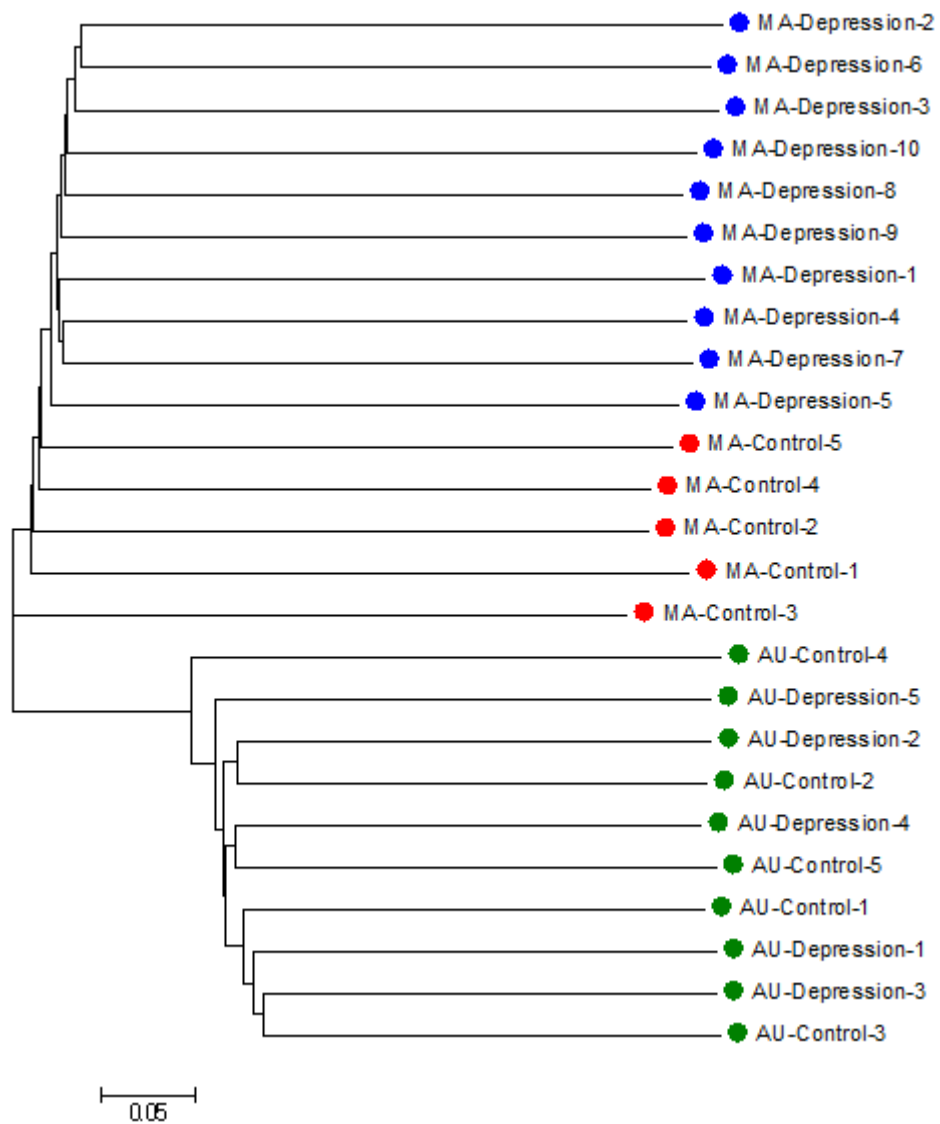

**Chromosome 11**

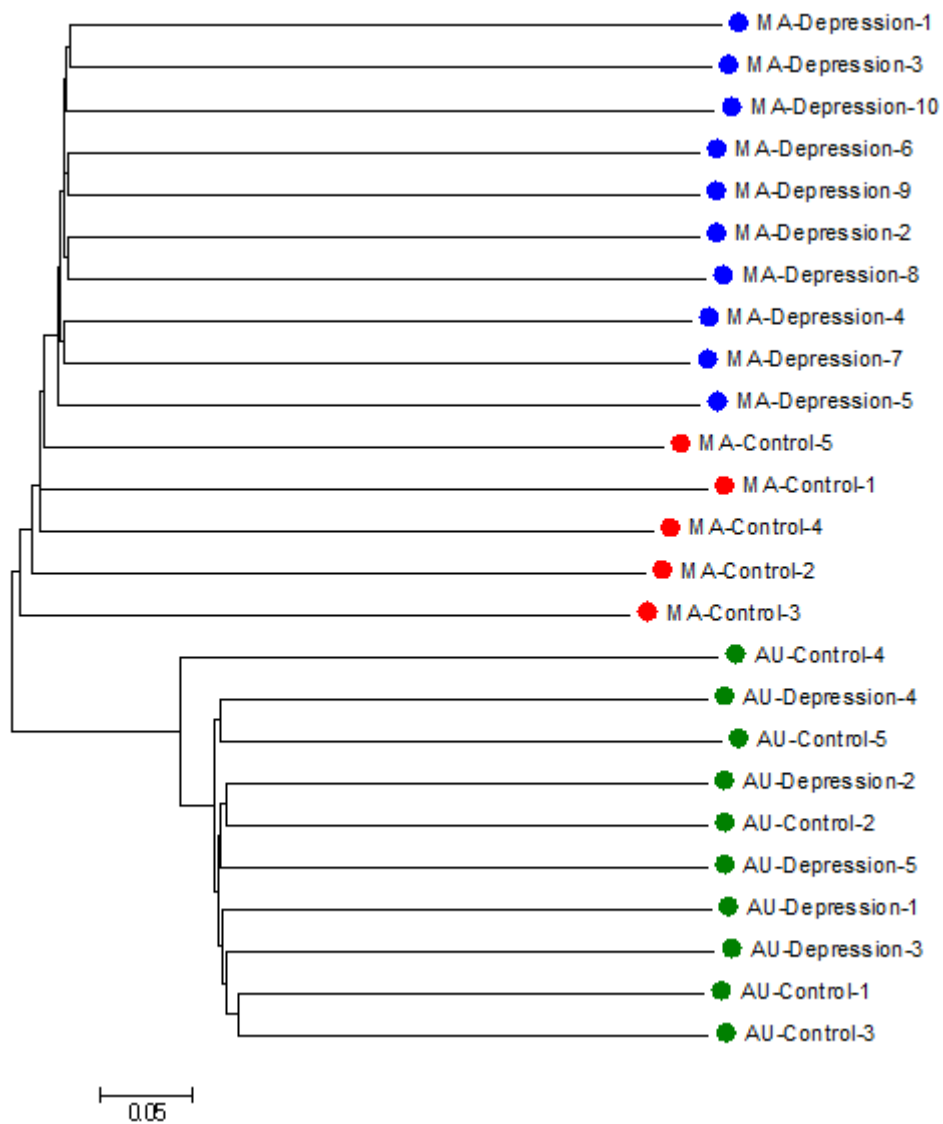

**Chromosome 12**



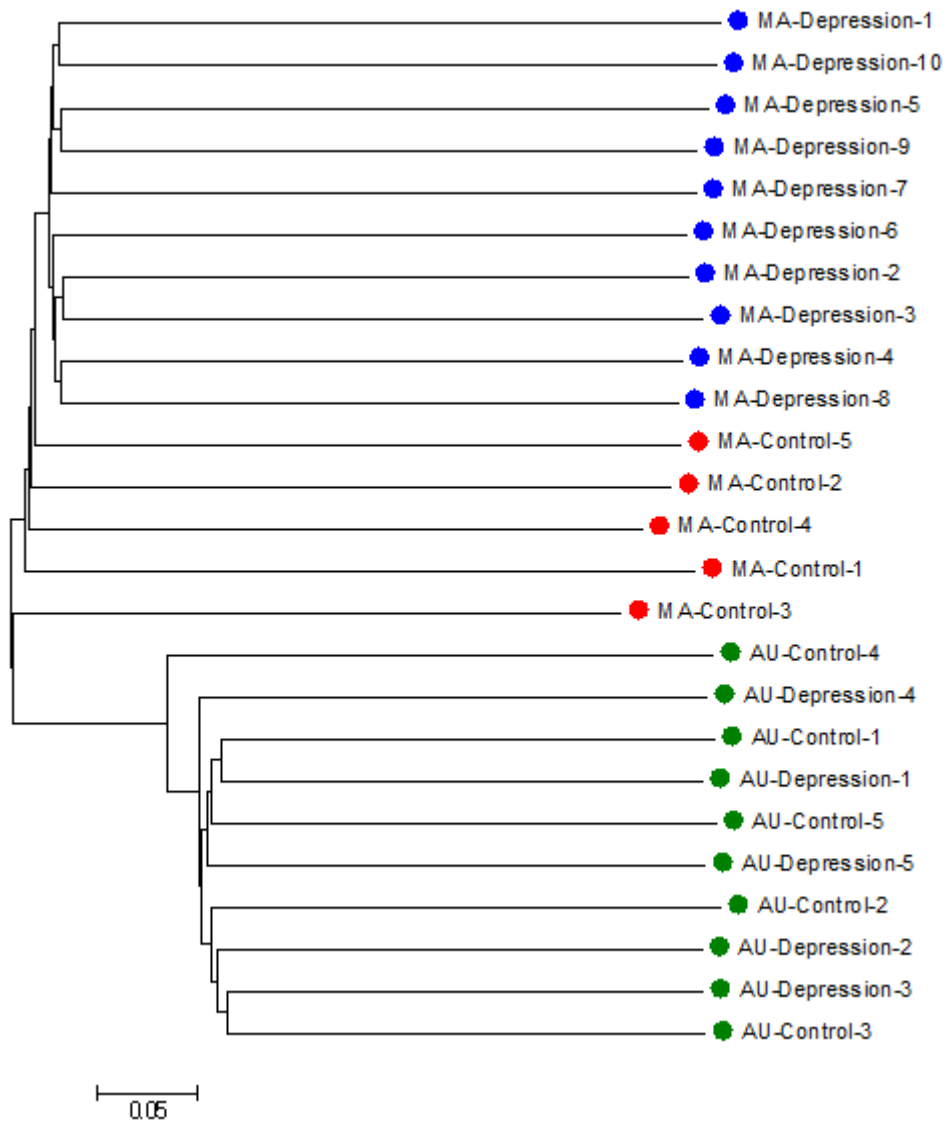

**Chromosome 13**

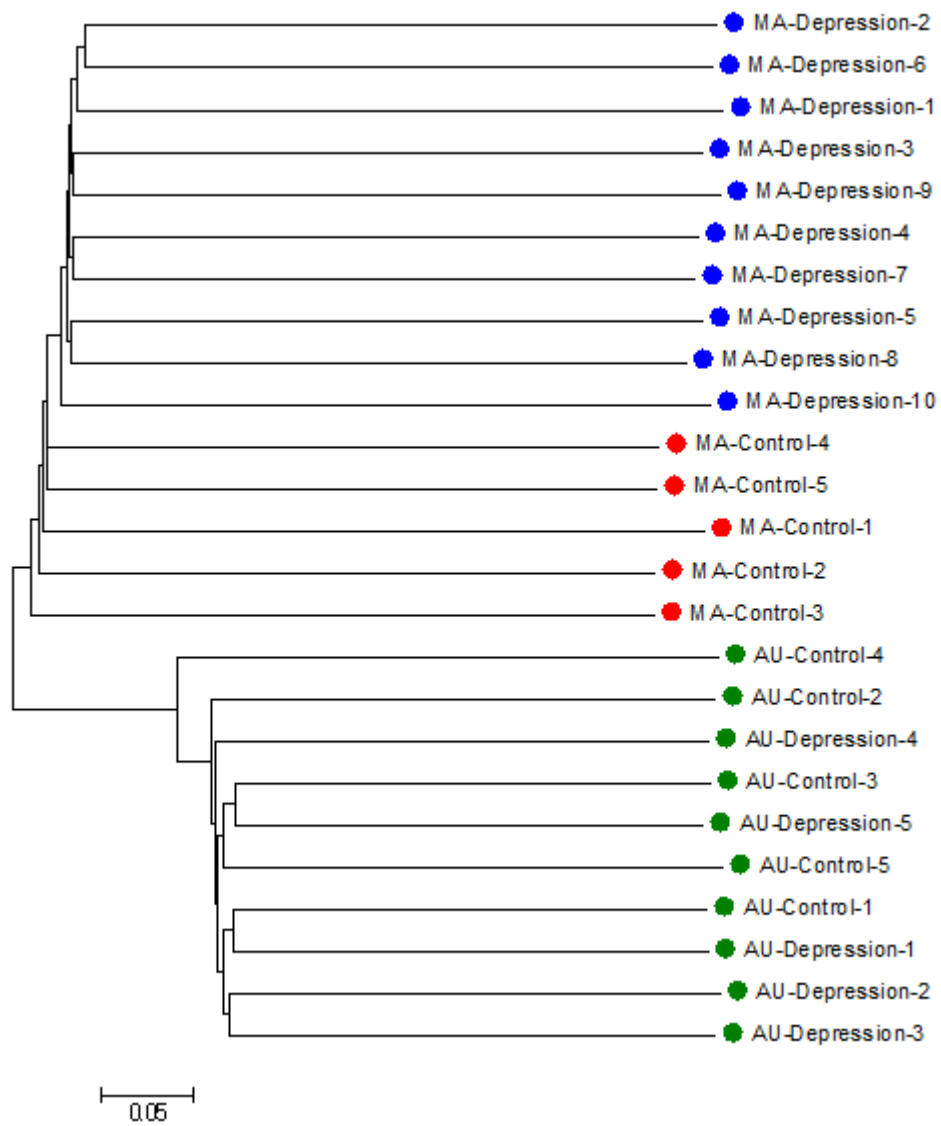

**Chromosome 14**

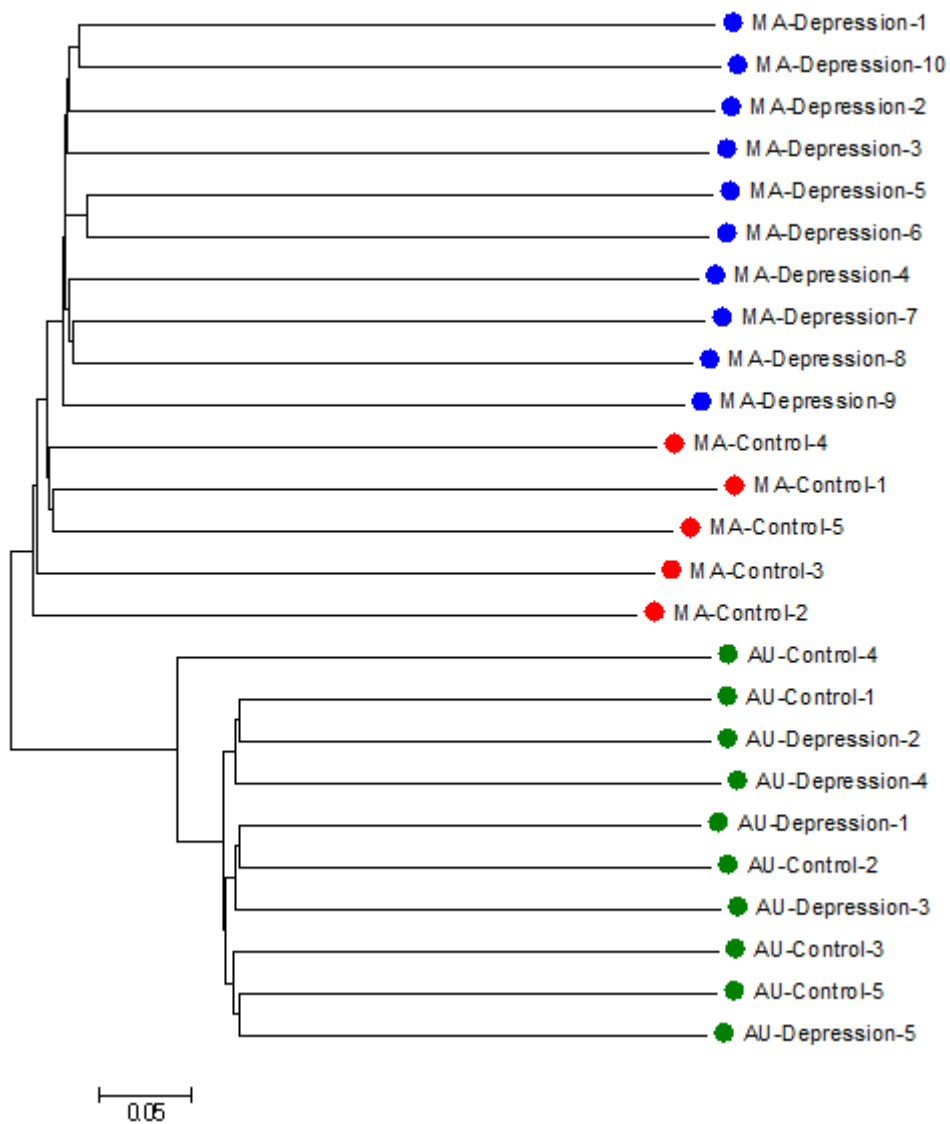

**Chromosome 15**

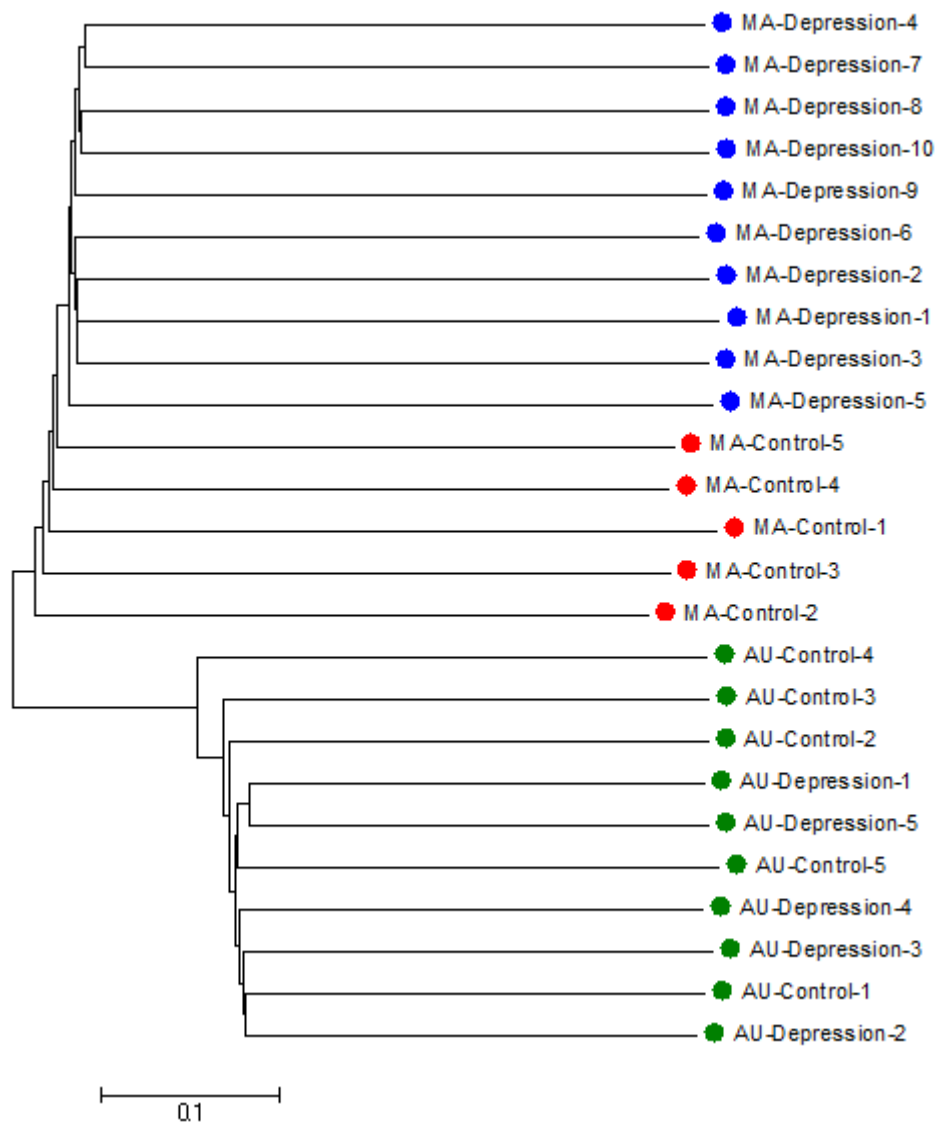

**Chromosome 16**

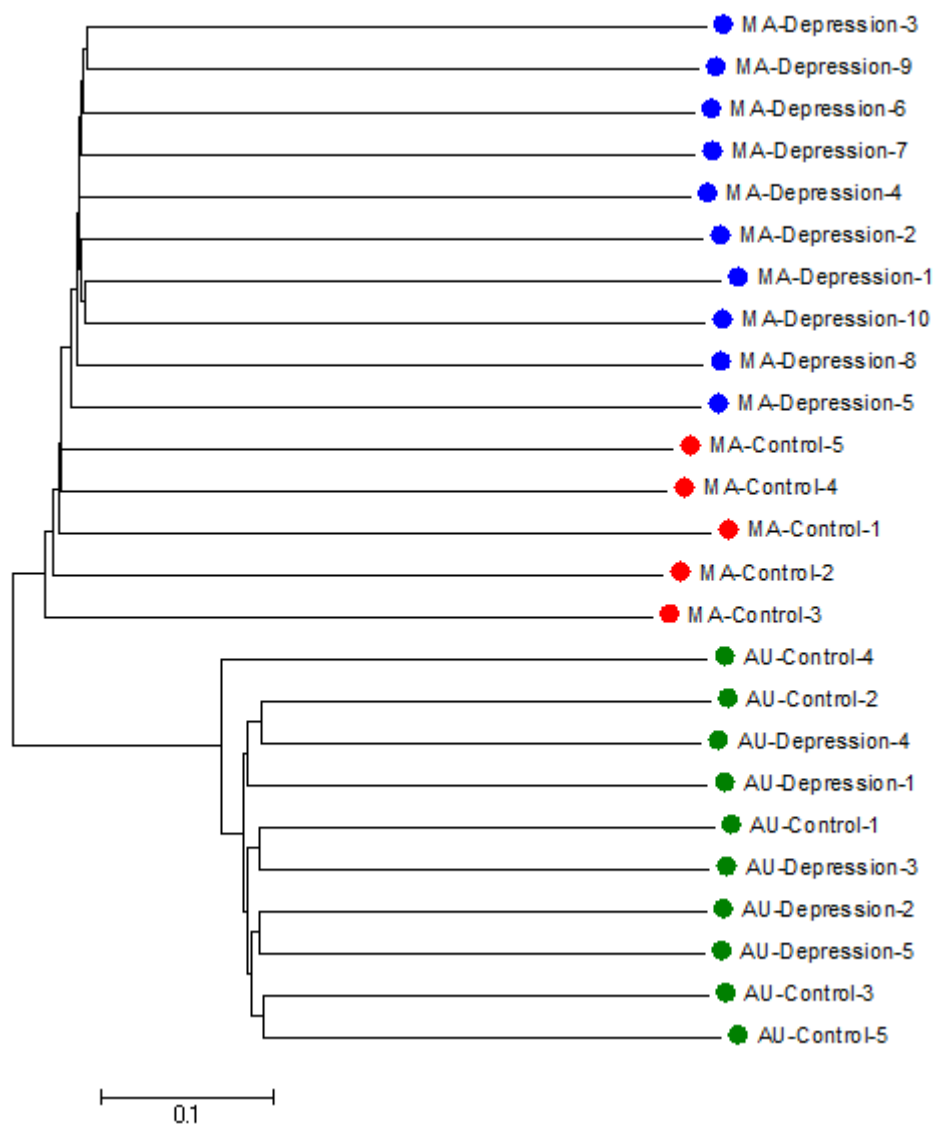

**Chromosome 17**

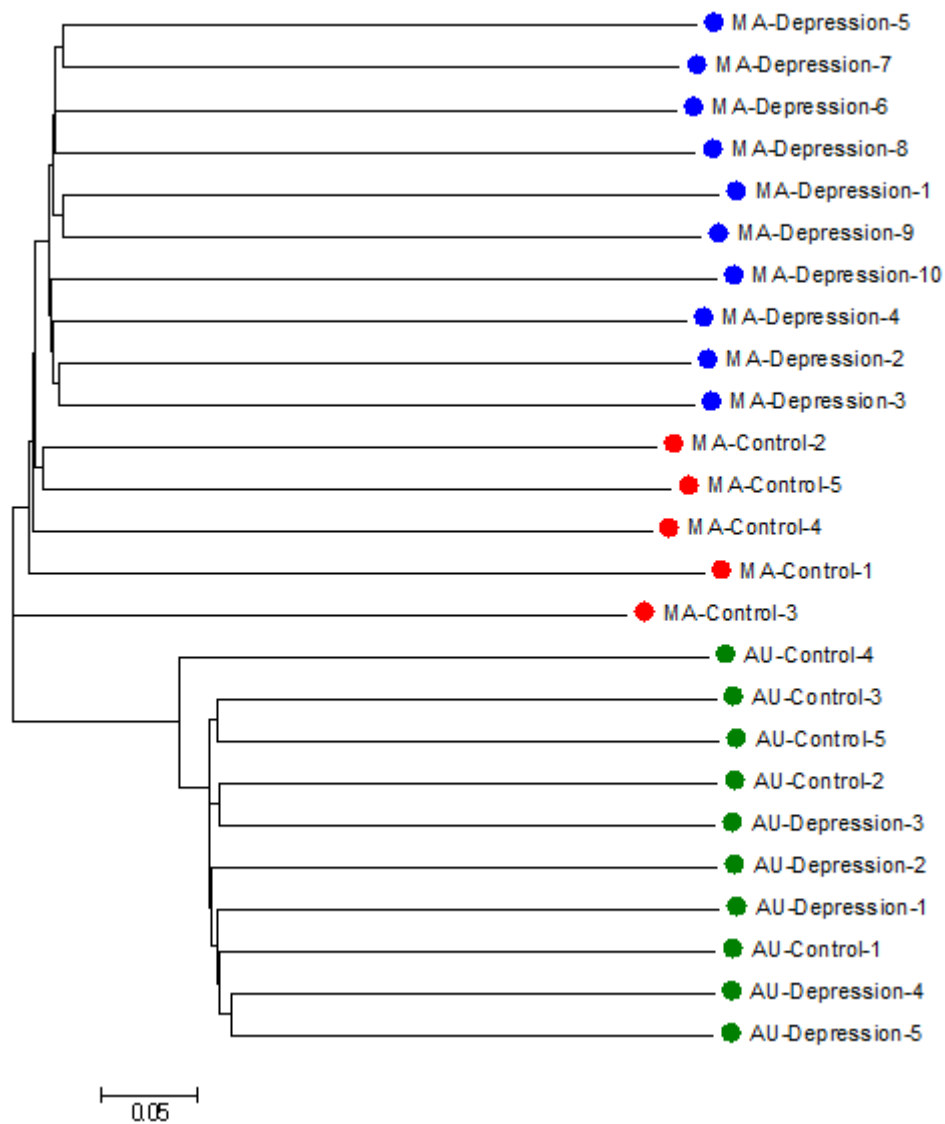

**Chromosome 18**

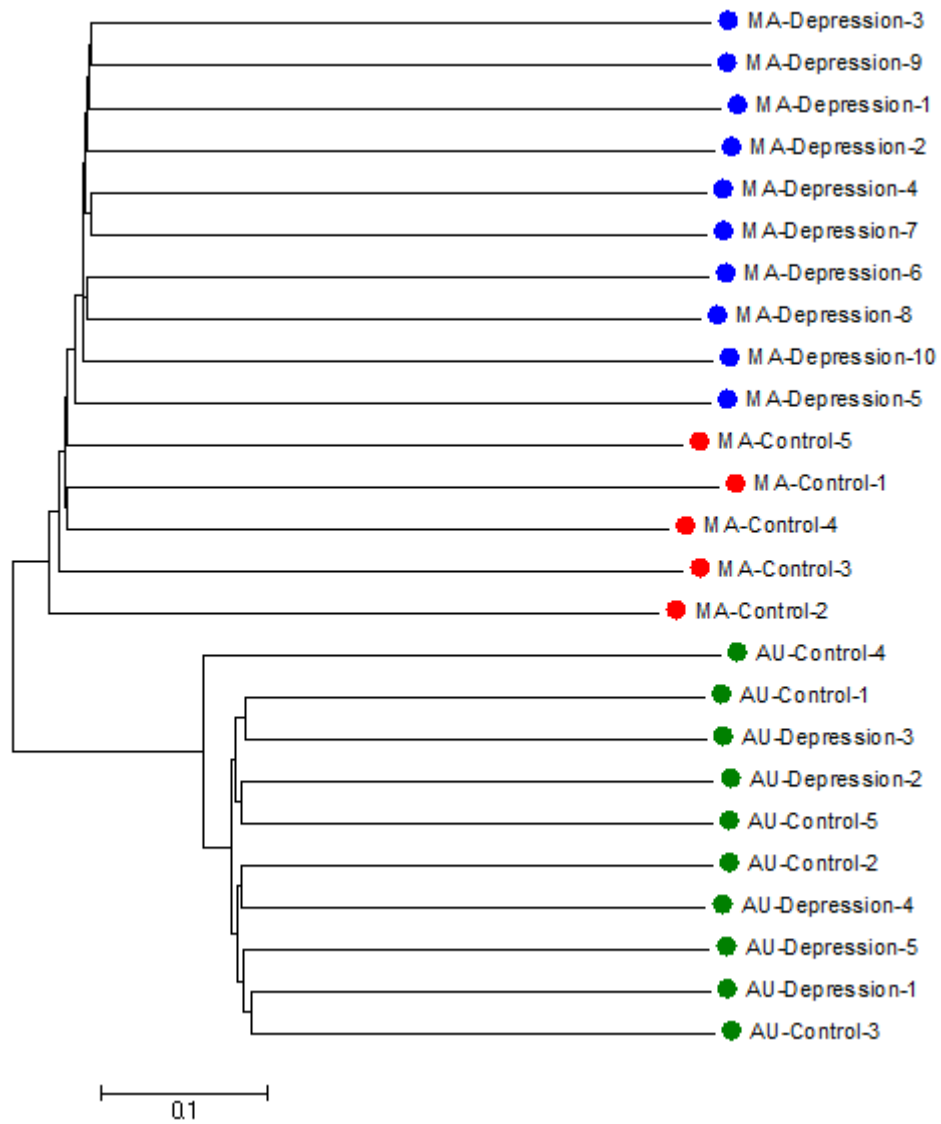

**Chromosome 19**

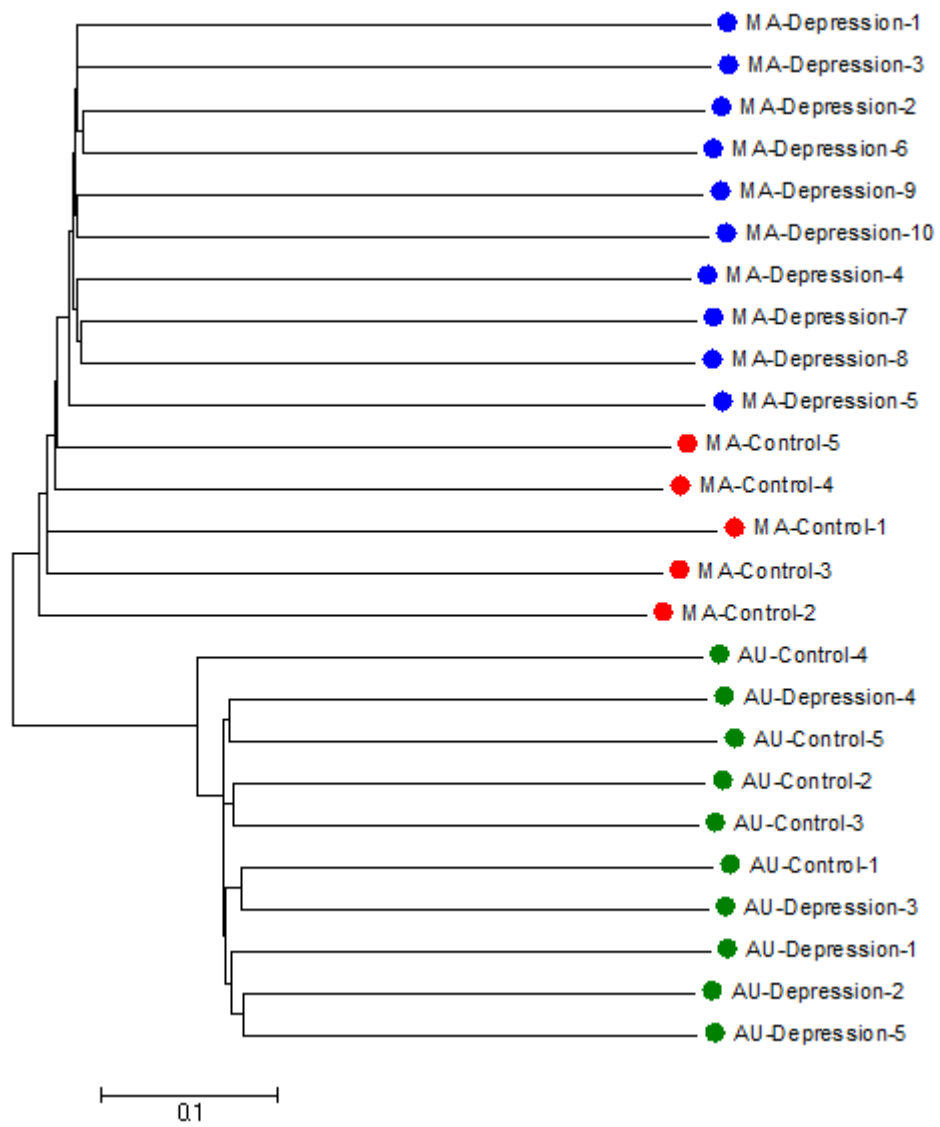

### Chromosome 20



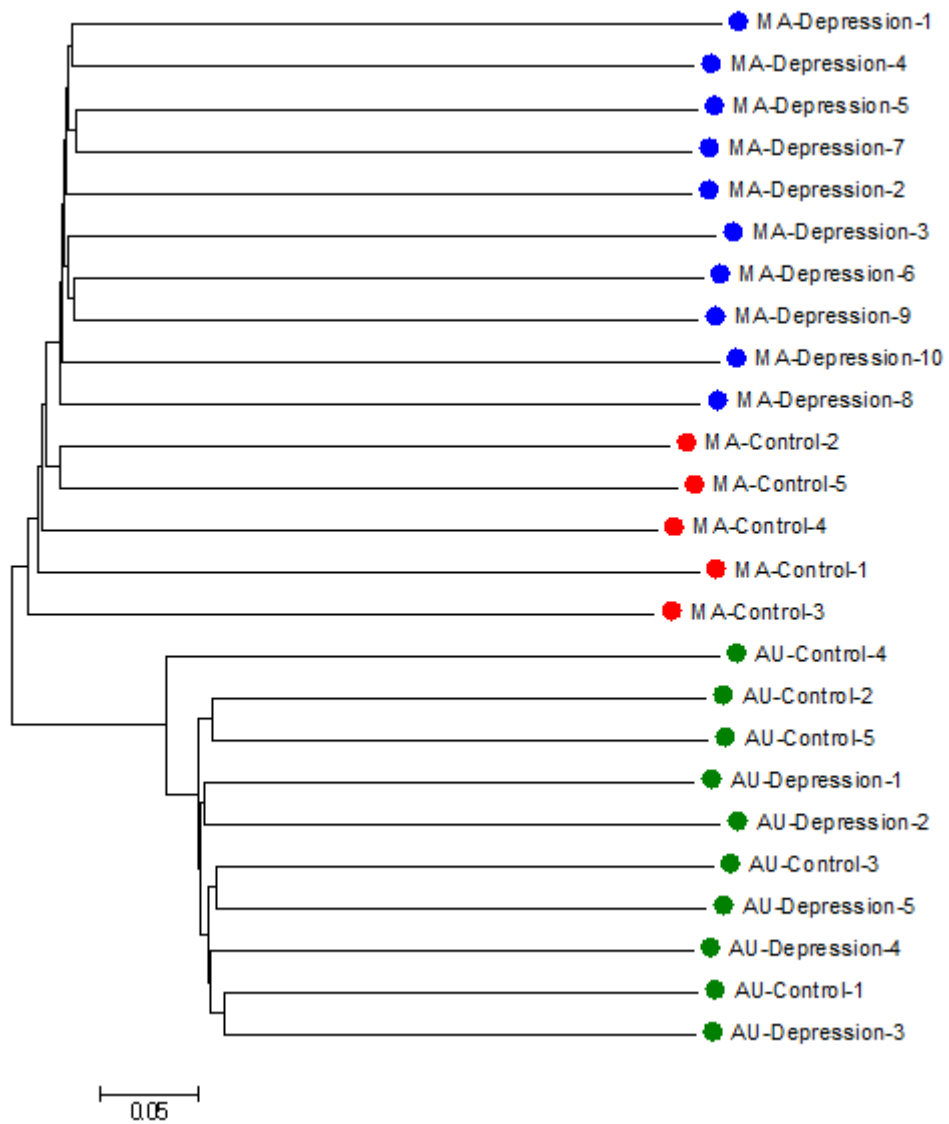

**Chromosome 21**

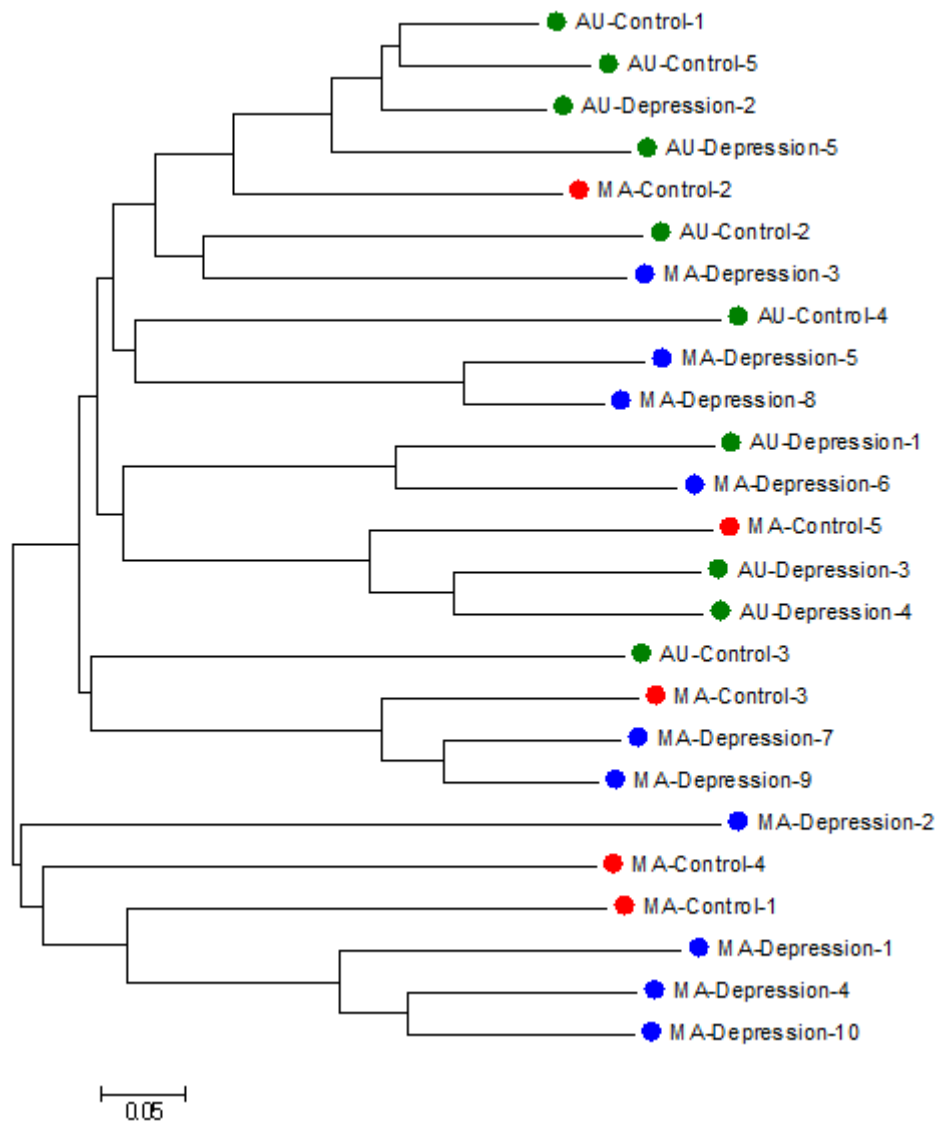

**Mitochondrial genome**
